# Supplementary material for: In silico study on Arabidopsis BAG gene expression in response to environmental stresses
Source: PubMed Central journal article supplement (PMC5216074; doi:10.1007/s00709-016-0961-3), 2016-03-22
Supplement: 709_2016_961_MOESM1_ESM.pdf [file 709_2016_961_MOESM1_ESM.pdf]

**SUPPLEMENTARY MATERIALS:**

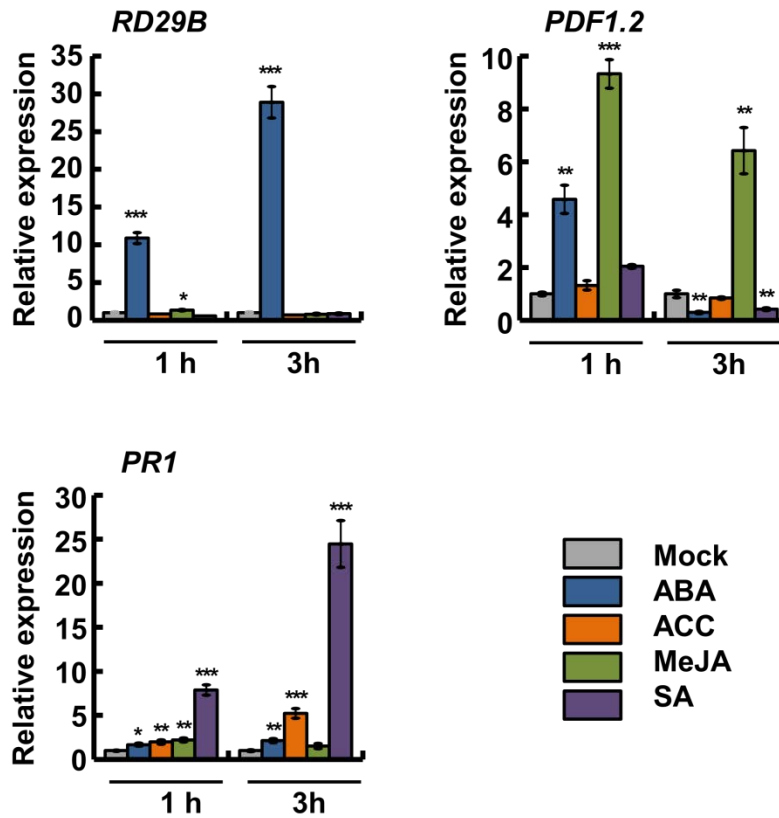

**Fig. S1 Determination of relative transcript abundances of marker genes under different hormone treatments by qRT-PCR.** 10-days-old seedlings were transferred to liquid 1/2 MS media supplemented with 10  $\mu$ M abscisic acid (ABA), 10  $\mu$ M 1-aminocyclopropane-1-carboxylic acid (ACC), 10  $\mu$ M methyl jasmonate (MeJA) and 0.5 mM salicylic acid (SA). Samples were harvested at 1h and 3h for total RNA isolation. Expression of marker genes was determined by qRT-PCR. Three biological replicates were averaged; error bars indicate standard error of the mean. Asterisks indicates statistically significant differences between normal and phytohormones treatments as calculated using the Student's t test (\* $P < 0.05$ , \*\*  $P < 0.01$ , and \*\*\* $P < 0.001$ , respectively). *RD29B*, responsive to desiccation 29B (AT5G52300); *PDF1.2*, plant defending 1.2 (AT5G44420); *PR1*, pathogenesis-related gene 1 (AT2G14610).
