# Supplementary material for: In silico study on Arabidopsis BAG gene expression in response to environmental stresses
Source: PubMed Central journal article supplement (PMC5216074; doi:10.1007/s00709-016-0961-3), 2016-03-22
Supplement: 709_2016_961_MOESM3_ESM.pdf [file 709_2016_961_MOESM3_ESM.pdf]

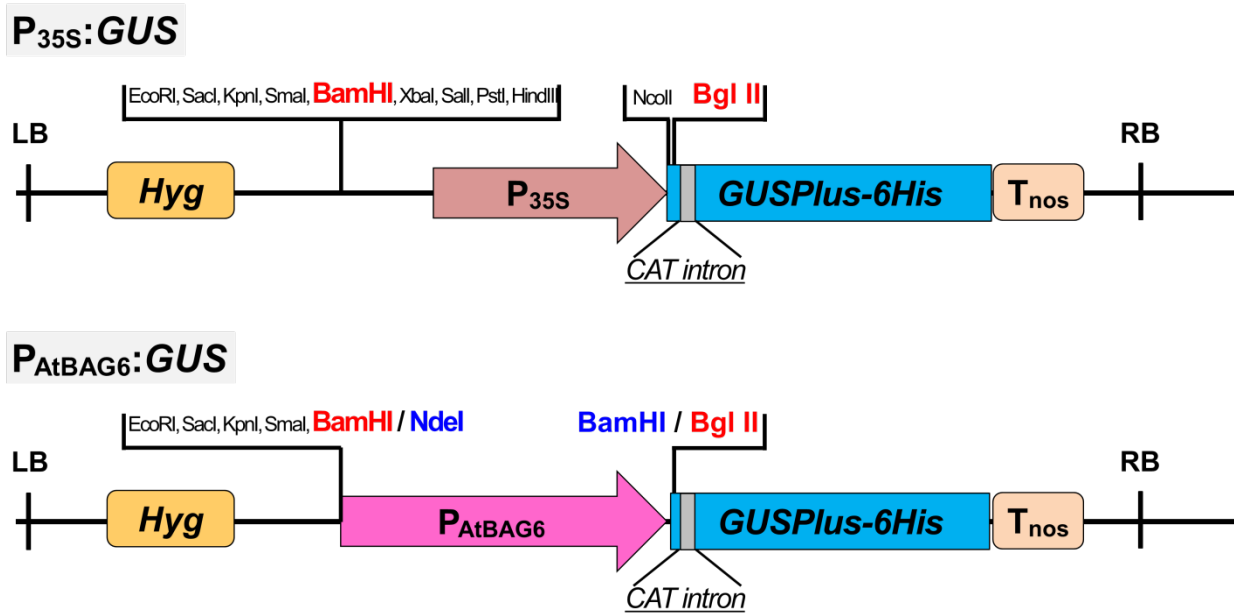

**Fig. S3 Schematic diagrams of the P<sub>35S</sub>:GUS and P<sub>AtBAG6</sub>:GUS constructs.** RB, right border; LB, left border; P<sub>35S</sub>, Cauliflower mosaic virus (*CaMV*) 35S promoter; P<sub>AtBAG6</sub>, *AtBAG6* gene promoter; *Hyg*, hygromycin phosphotransferase coding region; *GUSPlus-6His*,  $\beta$ -glucuronidase gene fused to six histidine codons; *CAT intron*, catalase gene intron; T<sub>nos</sub>, nopaline synthase terminator. The insertion position of the P<sub>AtBAG6</sub> in the vector is indicated by the restriction enzyme sites, *BamHI/NdeI* and *BamHI/BglII*. - See more in the Materials and Methods part.
