# Supplementary material for: In silico study on Arabidopsis BAG gene expression in response to environmental stresses
Source: PubMed Central journal article supplement (PMC5216074; doi:10.1007/s00709-016-0961-3), 2016-03-22
Supplement: 709_2016_961_MOESM4_ESM.pdf [file 709_2016_961_MOESM4_ESM.pdf]

**Table S1 Sequences of primers used in this research.**

| Gene          | Locus     | Primer                       | Sequences (5'-3')                          | Purpose     |
|---------------|-----------|------------------------------|--------------------------------------------|-------------|
| <i>Actin2</i> | AT3G18780 | Actin2-F                     | TGATGCACTTGTGTGTGACAA                      | qRT-PCR     |
|               |           | Actin2-R                     | GGGACTAAAACGCAAAACGA                       |             |
| <i>AtBAG1</i> | AT5G52060 | AtBAG1-F                     | AGATGATGAGAAACAAACCGACAA                   |             |
|               |           | AtBAG1-R                     | CGGAACCTCTACCGCCATTA                       |             |
| <i>AtBAG2</i> | AT5G62100 | AtBAG2-F                     | AAGGCAACCGCAAACGAA                         |             |
|               |           | AtBAG2-R                     | TGTCAGCATTTCCTGTTCCCT                      |             |
| <i>AtBAG3</i> | AT5G07220 | AtBAG3-F                     | GTCTCGACCTGGAGGAATGG                       |             |
|               |           | AtBAG3-R                     | ACGTGGCACATCGGAGTTC                        |             |
| <i>AtBAG4</i> | AT3G51780 | AtBAG4-F                     | AGCTGTAAGCACTGAGTGGGAAT                    |             |
|               |           | AtBAG3-R                     | TGGCGGAGGAGGGTTCA                          |             |
| <i>AtBAG5</i> | AT1G12060 | AtBAG5-F                     | TCCCGATTGAAACTCCATTACC                     |             |
|               |           | AtBAG5-R                     | GCGGTGGCGTTTGTTTTG                         |             |
| <i>AtBAG6</i> | AT2G46240 | AtBAG6-F                     | CCTGGCAACGGATTCTAAGC                       |             |
|               |           | AtBAG6-R                     | GGAATTGTTGTCGAGGAAGC                       |             |
| <i>AtBAG7</i> | AT5G62390 | AtBAG7-F                     | GTTTCGAGGAGCGAAGAGATCA                     |             |
|               |           | AtBAG7-R                     | GCGGGTCTACCACATCTAACATT                    |             |
| <i>COR15A</i> | AT2G42540 | COR15A-F                     | AACGAGGCCACAAAGAAAGC                       |             |
|               |           | COR15A-R                     | CAGCTTCTTTACCCAATGTATCTG                   |             |
| <i>PDF1.2</i> | AT5G44420 | PDF1.2-F                     | GCTTCCATCACCTTATCTTC                       |             |
|               |           | PDF1.2-R                     | GCCGGTGCCTCGAAA                            |             |
| <i>HSP101</i> | AT1G74310 | HSP101-F                     | CACAATCTCCTCCACCTGATGA                     |             |
|               |           | HSP101-R                     | GCACGACGAATGACCTTAATAAGA                   |             |
| <i>PR1</i>    | AT2G14610 | PR1-F                        | GTCTCCGCCGTGAACATGT                        |             |
|               |           | PR1-R                        | CGTGTTTCGACGCTAGTTGT                       |             |
| <i>HSFA6A</i> | AT5G43840 | HSFA6A-F                     | CCCTAGATGCTTTAAGCACAATAATTCT               |             |
|               |           | HSFA6A-R                     | ATCGATGTCATCACCATACTTCTGG                  |             |
| <i>RD29A</i>  | AT5G52310 | RD29A-F                      | GTTACTGATCCCACCAAAGAA                      |             |
|               |           | RD29A-R                      | GGAGACTCATCAGTCACTTCCA                     |             |
| <i>RD29B</i>  | AT5G52300 | RD29B-F                      | GCAAGCAGAAGAACCAATCA                       |             |
|               |           | RD29B-R                      | CTTTGGATGCTCCCTTCTCA                       |             |
| <i>AtBAG6</i> | AT2G46240 | P <sub>AtBAG6</sub> F-attB1* | <u>aaaaagcagg</u> catatgAACGAAACCCAAATAATT | Cloning     |
|               |           | P <sub>AtBAG6</sub> R-attB2* | <u>agaaagctggg</u> TTGTGATGGATCCATGTA      |             |
| <i>AtBAG6</i> | AT2G46240 | 6F                           | ATGATGCCTGTGTACATGGAT                      | genomic PCR |
|               |           | 6R                           | AGAGAAGGTACTTCGTCTGTCTCC                   |             |
| <i>AtBAG7</i> | AT5G62390 | 7F                           | ATGACTTTGTTCCATAGACTCGAT                   |             |
|               |           | 7R                           | TTCTTCTTCCGTTTCAAGCAT                      |             |
| <i>T-DNA</i>  |           | LBa                          | TGGTTCACGTAGTGGGCCATCG                     |             |

\* attB1 and attB2 sites are underlined.
